# Supplementary material
Source: PubMed Central journal article supplement (PMC2684476)

# Supplementary Fig 1

**A**

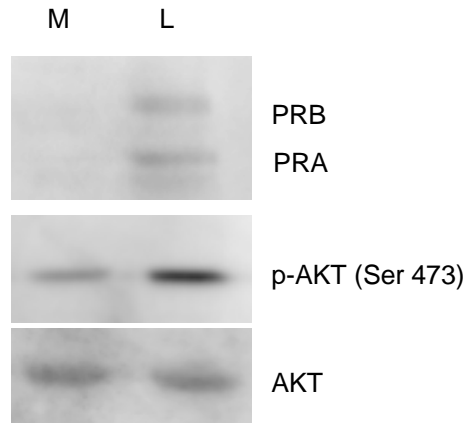

**B**

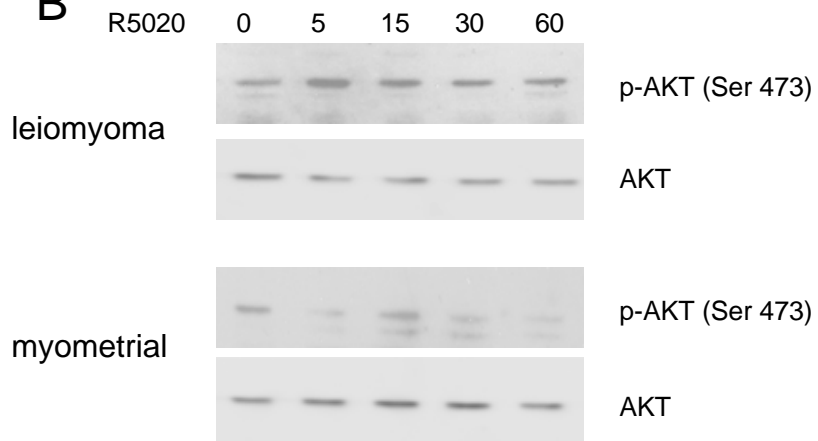

**C**

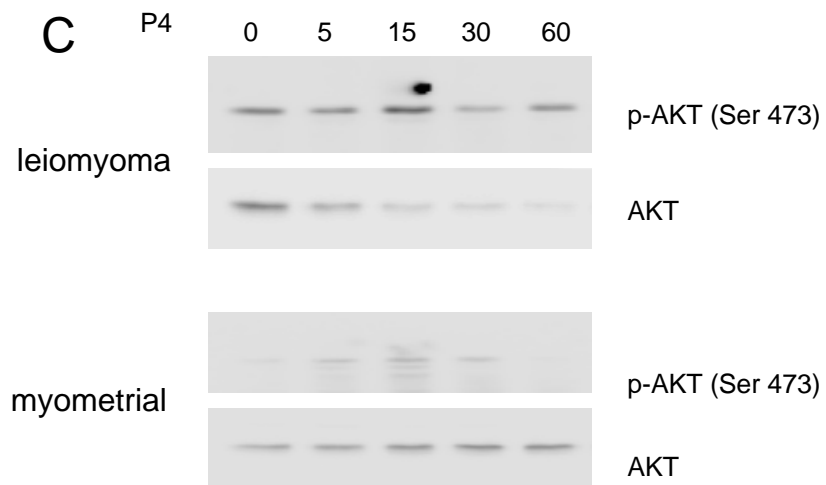

Supplement: jc.2008-2093_1.pdf [file jc.2008-2093_1.pdf]
